# Supplementary material for: Associations between Circulating Inflammatory Biomarkers and Indicators of Muscle Health in Older Men and Women
Source: MDPI journal article supplement (doi:10.3390/jcm10225316), 2021-11-15
Supplement: s1 [file s1]

**Table S1.** Biomarkers of systemic inflammation in men and women.

|                      | Women (n = 148) | Men (n = 90)   |
|----------------------|-----------------|----------------|
| TNF- $\alpha^a$ (au) | 3.1 $\pm$ 0.4   | 3.2 $\pm$ 0.4  |
| IL-6 (au)            | 3.3 $\pm$ 0.6   | 3.4 $\pm$ 0.8  |
| IL-10 (au)           | 3.7 $\pm$ 0.4   | 3.9 $\pm$ 0.4* |
| IL-18 (au)           | 8.0 $\pm$ 0.5   | 8.3 $\pm$ 0.5* |
| MCP-1 (au)           | 12.5 $\pm$ 0.4  | 12.5 $\pm$ 0.4 |
| MIP-1 $\alpha$ (au)  | 5.3 $\pm$ 0.5   | 5.5 $\pm$ 0.5* |

<sup>a</sup>Women n = 147. Au = arbitrary units. \* $p$  < 0.05 vs. women.

**Table S2.** Associations ( $\beta$ -coefficients and 95% CI) between muscle health and pro- and anti-inflammatory biomarkers in older women.

|                  | Skeletal muscle index <sup>a</sup> | 5-sit-to-stand          |
|------------------|------------------------------------|-------------------------|
| <b>Model 2</b>   |                                    |                         |
| CRP <sup>b</sup> | -0.379 (-0.619 to -0.139)*         | -                       |
| Fibrinogen       | -0.377 (-0.625 to -0.130)*         | -                       |
| TNF- $\alpha^a$  | -                                  | 0.189 (0.015 to 0.364)* |
| IL-6             | -0.369 (-0.622 to -0.130)          | -                       |
| <b>Model 3</b>   |                                    |                         |
| CRP <sup>b</sup> | -0.330 (-0.590 to -0.070)*         | -                       |
| Fibrinogen       | -0.358 (-0.625 to -0.091)*         | -                       |
| TNF- $\alpha^a$  | -                                  | 0.184 (0.003 to 0.364)* |
| IL-6             | -0.375 (-0.648 to -0.102)*         | -                       |
| <b>Model 4</b>   |                                    |                         |
| CRP <sup>b</sup> | -0.311 (-0.582 to -0.040)*         | -                       |
| Fibrinogen       | -0.415 (-0.692 to -0.139)*         | -                       |
| TNF- $\alpha^a$  | -                                  | 0.188 (0.007 to 0.369)* |
| IL-6             | -0.364 (-0.648 to -0.040)*         | -                       |

<sup>a</sup>n = 147. <sup>b</sup>n = 146. Model 2 = Data adjusted by WC, age, medication use (Yes/No) and protein intake. Model 3 = Model 2 + average counts per minute. Model 4 = Model 3 + Participation in  $\geq 2$  muscle strengthening activities per week (Yes/No). \* $p$  < 0.05. CRP = C-reactive protein. TNF- $\alpha$  = tumor necrosis factor alpha. IL-6 = interleukin-6.
